# Supplementary material for: Chenopodium Quinoa and Salvia Hispanica Provide Immunonutritional Agonists to Ameliorate Hepatocarcinoma Severity under a High-Fat Diet
Source: PubMed Central journal article supplement (PMC7400258; doi:10.3390/nu12071946), 2020-06-30
Supplement: nutrients-12-01946-s001.pdf [file nutrients-12-01946-s001.pdf]

**Supplementary Table 1.** Genus-, group- and species-specific primers used to quantify the different bacterial groups of the intestinal microbiota.

| Target bacteria           | Primer    | Sequence (5 to 3)         | Product size (bp) | Annealing T <sup>a</sup> (°C) |
|---------------------------|-----------|---------------------------|-------------------|-------------------------------|
| Total bacteria            | HDA1      | ATCCCTACGGGAGGCAGCAGT     | 200               | 59                            |
|                           | HDA2      | GTATTACCGCGGCTGCTGGCAC    |                   |                               |
| <i>Lactobacillus</i>      | LAC1      | ACGAGTAGGGAATCTTCCA       | 340               | 61                            |
|                           | LAC2      | ATTYCACCGCTACACATG        |                   |                               |
| <i>Bifidobacteria</i>     | g-Bifid-F | CTCCTGGAAACGGGTGG         | 549–563           | 55                            |
|                           | g-Bifid-R | GGTGTCTTCCCGATATCTACA     |                   |                               |
| <i>Bacteroides group</i>  | Bfra 531F | ATACGGAGGATCCGAGCGTTA     | 293               | 65                            |
|                           | Bfra 766R | CTGTTTGATACCCACACT        |                   |                               |
| <i>Enterobacteriaceae</i> | Eco1457F  | CATTGACGTTACCCGCAGAAGAAGC | 195               | 63                            |
|                           | Eco1652R  | CTCTACGAGACTCAAGCTTGC     |                   |                               |
| <i>Firmicutes</i>         | Firm_1    | TGAAACTYAAAGGAATTGACG     | 650               | 60                            |
|                           | Firm_2    | ACCATGCACCACCTGTC         |                   |                               |

**References:**

- Matsuki, T., Watanabe, K., Fujimoto, J., Miyamoto, Y., Takada, T., Matsumoto, K., Oyaizu, O., Tanaka, R. Development of 16S rRNA-gene-targeted group-specific primers for the detection and identification of predominant bacteria in human feces. *Appl Environ Microbiol* 2002, 68, 5445–51.
- Malinen, E., Kassinen, A., Rinttila, T., Palva, A. Comparison of real-time PCR with SYBR Green I or 59-nuclease assays and dot-blot hybridization with rDNA-targeted oligonucleotide probes in quantification of selected faecal bacteria. *Microbiology* 2003, 149, 269–277.
- Walter, J., Tannock, G. W., Tilsala-Timisjarvi, A., Rodtong, S., Loach, D. M., Munro, K., Alatosava, T. Detection and identification of gastrointestinal *Lactobacillus* species by using denaturing gradient gel electrophoresis and species-specific PCR primers. *Appl. Environ. Microbiol.* 2000, 66, 297–303

Vanhoutte, T., De Preter, V., De Brandt, E., Verbeke, K. Swings, J., Huys, G. Molecular Monitoring of the Fecal Microbiota of Healthy Human Subjects During Administration of Lactulose and *Saccharomyces Boulardii*. *Appl Environ Microbiol.* 2006, 72(9), 5990-7.

Bartosch, S., Fite, A., Macfarlane, G.T., McMurdo, M.E.T. Characterization of Bacterial Communities in Feces From Healthy Elderly Volunteers and Hospitalized Elderly Patients by Using Real-Time PCR and Effects of Antibiotic Treatment on the Fecal Microbiota. *Appl Environ Microbiol.* 2004, 70(6),3575-81.
